# Supplementary material for: The Impact of Technology Teaching in the Dental Predoctoral Curriculum on Students’ Perception of Digital Dentistry
Source: MDPI journal article supplement (doi:10.3390/dj12030075), 2024-03-13
Supplement: s1 [file s1]

## Supplementary Figure

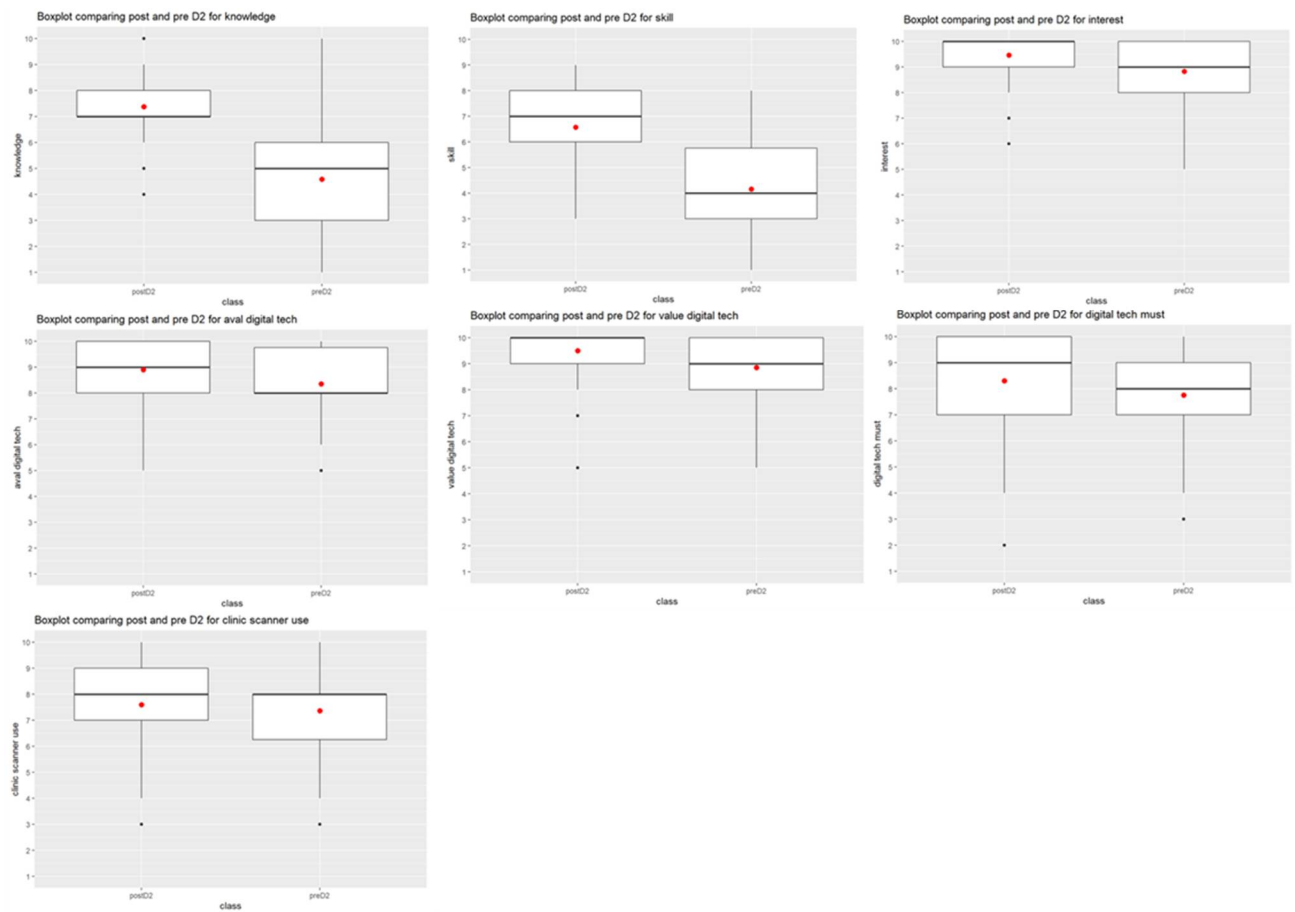

**Suppl. Figure S1.** Box plot for the areas of interest studied, comparing pre-D2 and post-D2.
